# Supplementary material
Source: Copernicus journal article supplement (doi:10.5194/bg-23-2503-2026)
Supplement: Supplementary file 1 [file bg-23-2503-2026-supplement.pdf]

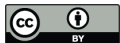

*Supplement of*

## **Ecological and environmental controls on plant wax production and stable isotope fractionation in modern terrestrial Arctic vegetation**

**Kurt R. Lindberg et al.**

*Correspondence to:* Kurt R. Lindberg ([kurtrlindberg@gmail.com](mailto:kurtrlindberg@gmail.com))

The copyright of individual parts of the supplement might differ from the article licence.

## **S1. Introduction**

This supplement contains Figures S1-S3 and Tables S1-S3.

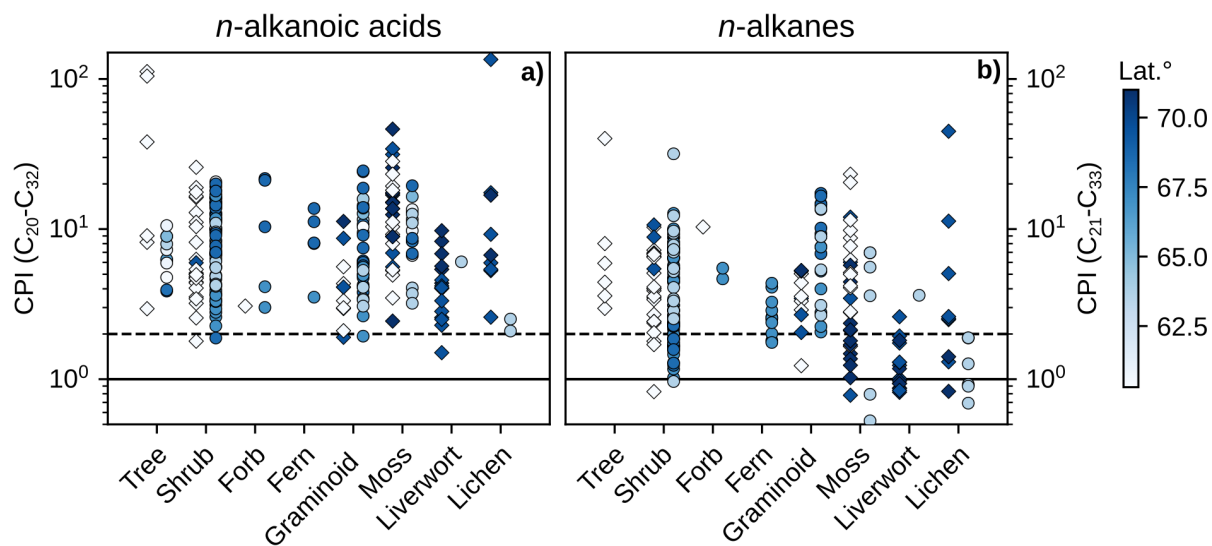

**Figure S1.** Scatterplots of plant wax Carbon Preference Index (CPI; Eq. 4, 5; Marzi et al., 1993) results from this study (diamonds) and the pan-Arctic literature compilation (circles) grouped by plant growth form. (a) *n*-alkanoic acid CPI for carbon chain-lengths C<sub>20</sub> through C<sub>32</sub>. (b) *n*-alkane CPI for carbon chain-lengths C<sub>21</sub> through C<sub>33</sub>. Data points are shaded by sampling site latitude. Solid and dashed horizontal lines mark CPI values of 1 and 2, respectively.

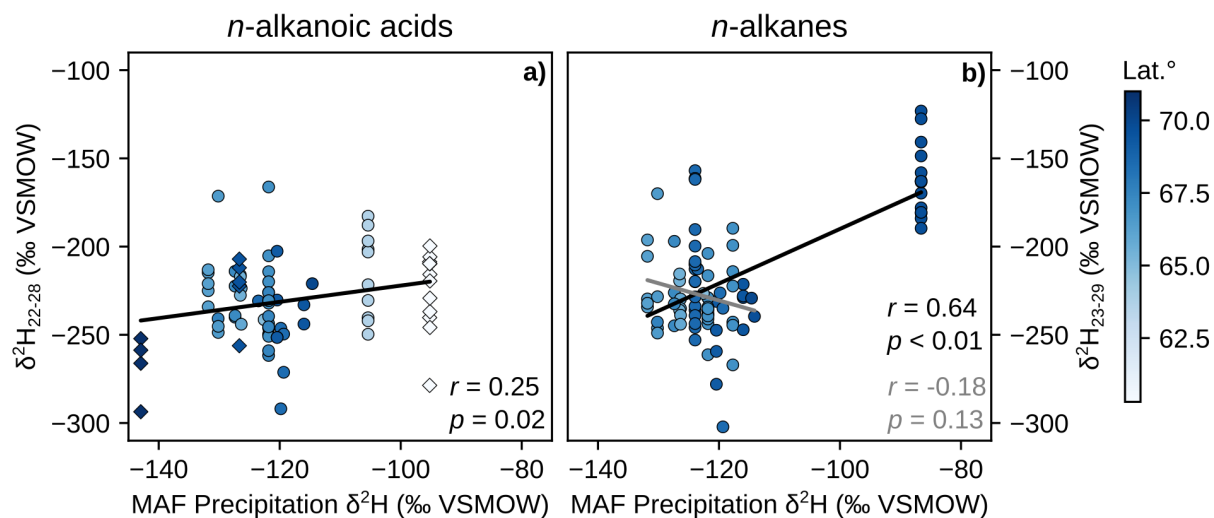

**Figure S2.** Scatterplots of plant wax  $\delta^2\text{H}$  from this study (diamonds) and the pan-Arctic data compilation (circles) vs. sample site MAF amount-weighted precipitation  $\delta^2\text{H}$  (Bowen et al., 2005; Bowen and Revenaugh, 2003). (a) *n*-alkanoic acid  $\delta^2\text{H}$  ( $\text{C}_{22}\text{-C}_{28}$ ). (b) *n*-alkane  $\delta^2\text{H}$  ( $\text{C}_{23}\text{-C}_{29}$ ). Pearson correlation  $r$  and  $p$  values are shown in the bottom-right corner of each panel. Black lines represent linear regressions fit for all data points. The grey line in panel b represents the linear regression fit without the data from Hollabåtjønnen Bog in northern Norway (Balascio et al., 2018). Data points are shaded by sampling site latitude. Pearson correlations and linear regressions in each panel were performed on the pan-Arctic dataset using all plant growth forms (see Table S2 for sample counts).

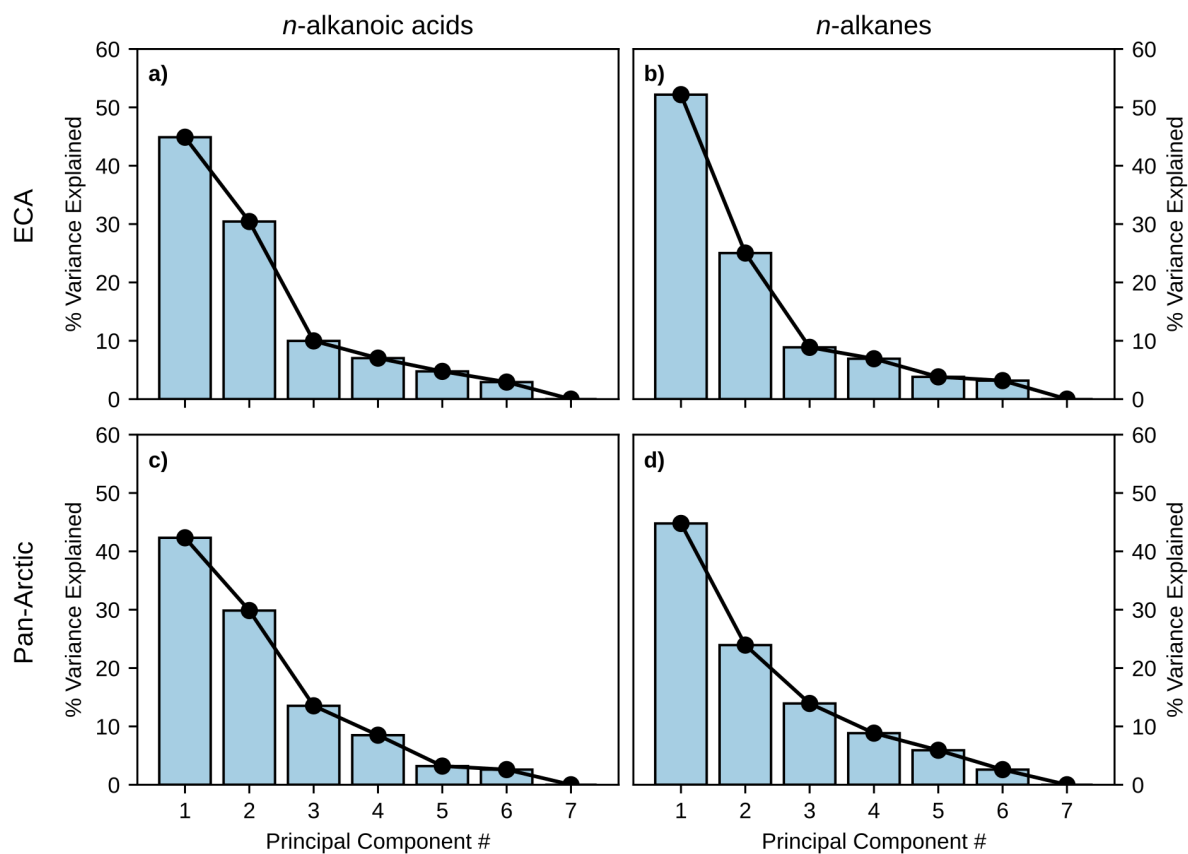

**Figure S3.** Scree plots of the percent variance explained by each principal component number. (a) ECA *n*-alkanoic acid PCA, (b) ECA *n*-alkane PCA, (c) pan-Arctic *n*-alkanoic acid PCA, (d) pan-Arctic *n*-alkane PCA. Panel lettering corresponds to that shown in Fig. 5.

**Table S1.** Pan-Arctic plant wax data sample sizes per data type and plant growth form.

| Growth Form | <i>n</i> -alkanoic acids |     |                       |                    | <i>n</i> -alkanes |     |                       |                    |
|-------------|--------------------------|-----|-----------------------|--------------------|-------------------|-----|-----------------------|--------------------|
|             | Conc.                    | ACL | $\delta^{13}\text{C}$ | $\delta^2\text{H}$ | Conc.             | ACL | $\delta^{13}\text{C}$ | $\delta^2\text{H}$ |
| Tree        | 17                       | 17  | 2                     | 2                  | 6                 | 7   | 0                     | 1                  |
| Shrub       | 102                      | 130 | 35                    | 73                 | 129               | 165 | 16                    | 115                |
| Forb        | 6                        | 13  | 2                     | 9                  | 6                 | 13  | 2                     | 12                 |
| Fern        | 5                        | 5   | 1                     | 0                  | 15                | 15  | 1                     | 11                 |
| Graminoid   | 46                       | 47  | 11                    | 20                 | 39                | 41  | 5                     | 19                 |
| Moss        | 49                       | 50  | 8                     | 9                  | 49                | 51  | 0                     | 4                  |
| Liverwort   | 18                       | 18  | 5                     | 4                  | 18                | 18  | 0                     | 0                  |
| Lichen      | 13                       | 13  | 2                     | 2                  | 17                | 17  | 0                     | 2                  |

**Table S2.** Pan-Arctic plant wax data sample sizes per data type and plant growth form with plant samples of the same species from the same location and sample year averaged.

| Growth Form | <i>n</i> -alkanoic acids |     |                       |                    | <i>n</i> -alkanes |     |                       |                    |
|-------------|--------------------------|-----|-----------------------|--------------------|-------------------|-----|-----------------------|--------------------|
|             | Conc.                    | ACL | $\delta^{13}\text{C}$ | $\delta^2\text{H}$ | Conc.             | ACL | $\delta^{13}\text{C}$ | $\delta^2\text{H}$ |
| Tree        | 14                       | 14  | 2                     | 2                  | 4                 | 5   | 0                     | 1                  |
| Shrub       | 55                       | 82  | 17                    | 43                 | 44                | 79  | 5                     | 53                 |
| Forb        | 6                        | 13  | 2                     | 9                  | 6                 | 13  | 2                     | 12                 |
| Fern        | 5                        | 5   | 1                     | 0                  | 6                 | 6   | 1                     | 3                  |
| Graminoid   | 36                       | 37  | 11                    | 14                 | 27                | 29  | 5                     | 13                 |
| Moss        | 42                       | 43  | 6                     | 7                  | 37                | 39  | 0                     | 4                  |
| Liverwort   | 10                       | 10  | 3                     | 3                  | 10                | 10  | 0                     | 0                  |
| Lichen      | 8                        | 8   | 2                     | 2                  | 12                | 12  | 0                     | 2                  |

**Table S3.** *P*-value results of Shapiro-Wilk tests performed on each plant growth form for each plant wax data type by compound class. *P*-values  $\geq 0.05$  indicate that measurements within a plant growth form are normally distributed. Missing values (-) are due to a plant growth form not having enough measurements ( $n < 3$ ) of an individual plant wax data type.

| Growth Form | <i>n</i> -alkanoic acids |        |                       |                  | <i>n</i> -alkanes |       |                       |                  |
|-------------|--------------------------|--------|-----------------------|------------------|-------------------|-------|-----------------------|------------------|
|             | log Conc.                | ACL    | $\delta^{13}\text{C}$ | $\epsilon_{app}$ | log Conc.         | ACL   | $\delta^{13}\text{C}$ | $\epsilon_{app}$ |
| Tree        | 0.260                    | 0.376  | -                     | -                | 0.957             | 0.664 | -                     | -                |
| Shrub       | <0.001                   | <0.001 | 0.972                 | 0.049            | 0.389             | 0.023 | 0.926                 | <0.001           |
| Forb        | 0.475                    | 0.593  | -                     | 0.527            | 0.833             | 0.234 | -                     | 0.404            |
| Fern        | 0.538                    | 0.342  | -                     | -                | 0.043             | 0.011 | -                     | 0.778            |
| Graminoid   | 0.118                    | 0.859  | 0.421                 | 0.059            | 0.376             | 0.004 | 0.946                 | 0.279            |
| Moss        | 0.976                    | 0.628  | 0.593                 | 0.596            | 0.748             | 0.540 | -                     | 0.946            |
| Liverwort   | 0.857                    | 0.875  | 0.247                 | 0.705            | 0.752             | 0.114 | -                     | -                |
| Lichen      | 0.745                    | 0.309  | -                     | -                | 0.074             | 0.018 | -                     | -                |

## References

- Balascio, N. L., D'Andrea, W. J., Anderson, R. S., and Wickler, S.: Influence of vegetation type on n-alkane composition and hydrogen isotope values from a high latitude ombrotrophic bog, *Organic Geochemistry*, 121, 48–57, <https://doi.org/10.1016/j.orggeochem.2018.03.008>, 2018.
- 5 Bowen, G. J. and Revenaugh, J.: Interpolating the isotopic composition of modern meteoric precipitation, *Water resources research*, 39, <https://doi.org/10.1029/2003WR002086>, 2003.
- Bowen, G. J., Wassenaar, L. I., and Hobson, K. A.: Global application of stable hydrogen and oxygen isotopes to wildlife forensics, *Oecologia*, 143, 337–348, <https://doi.org/10.1007/s00442-004-1813-y>, 2005.
- 10 Marzi, R., Torkelson, B., and Olson, R.: A revised carbon preference index, *Organic Geochemistry*, 20, 1303–1306, [https://doi.org/10.1016/0146-6380\(93\)90016-5](https://doi.org/10.1016/0146-6380(93)90016-5), 1993.
